# Supplementary material for: Differentially expressed genes associated with high metabolic tumor volume served as diagnostic markers and potential therapeutic targets for pancreatic cancer
Source: Springer Nature journal article supplement (doi:10.1186/s12967-024-05181-z), 2024-05-13

# Supplementary Figure S8.

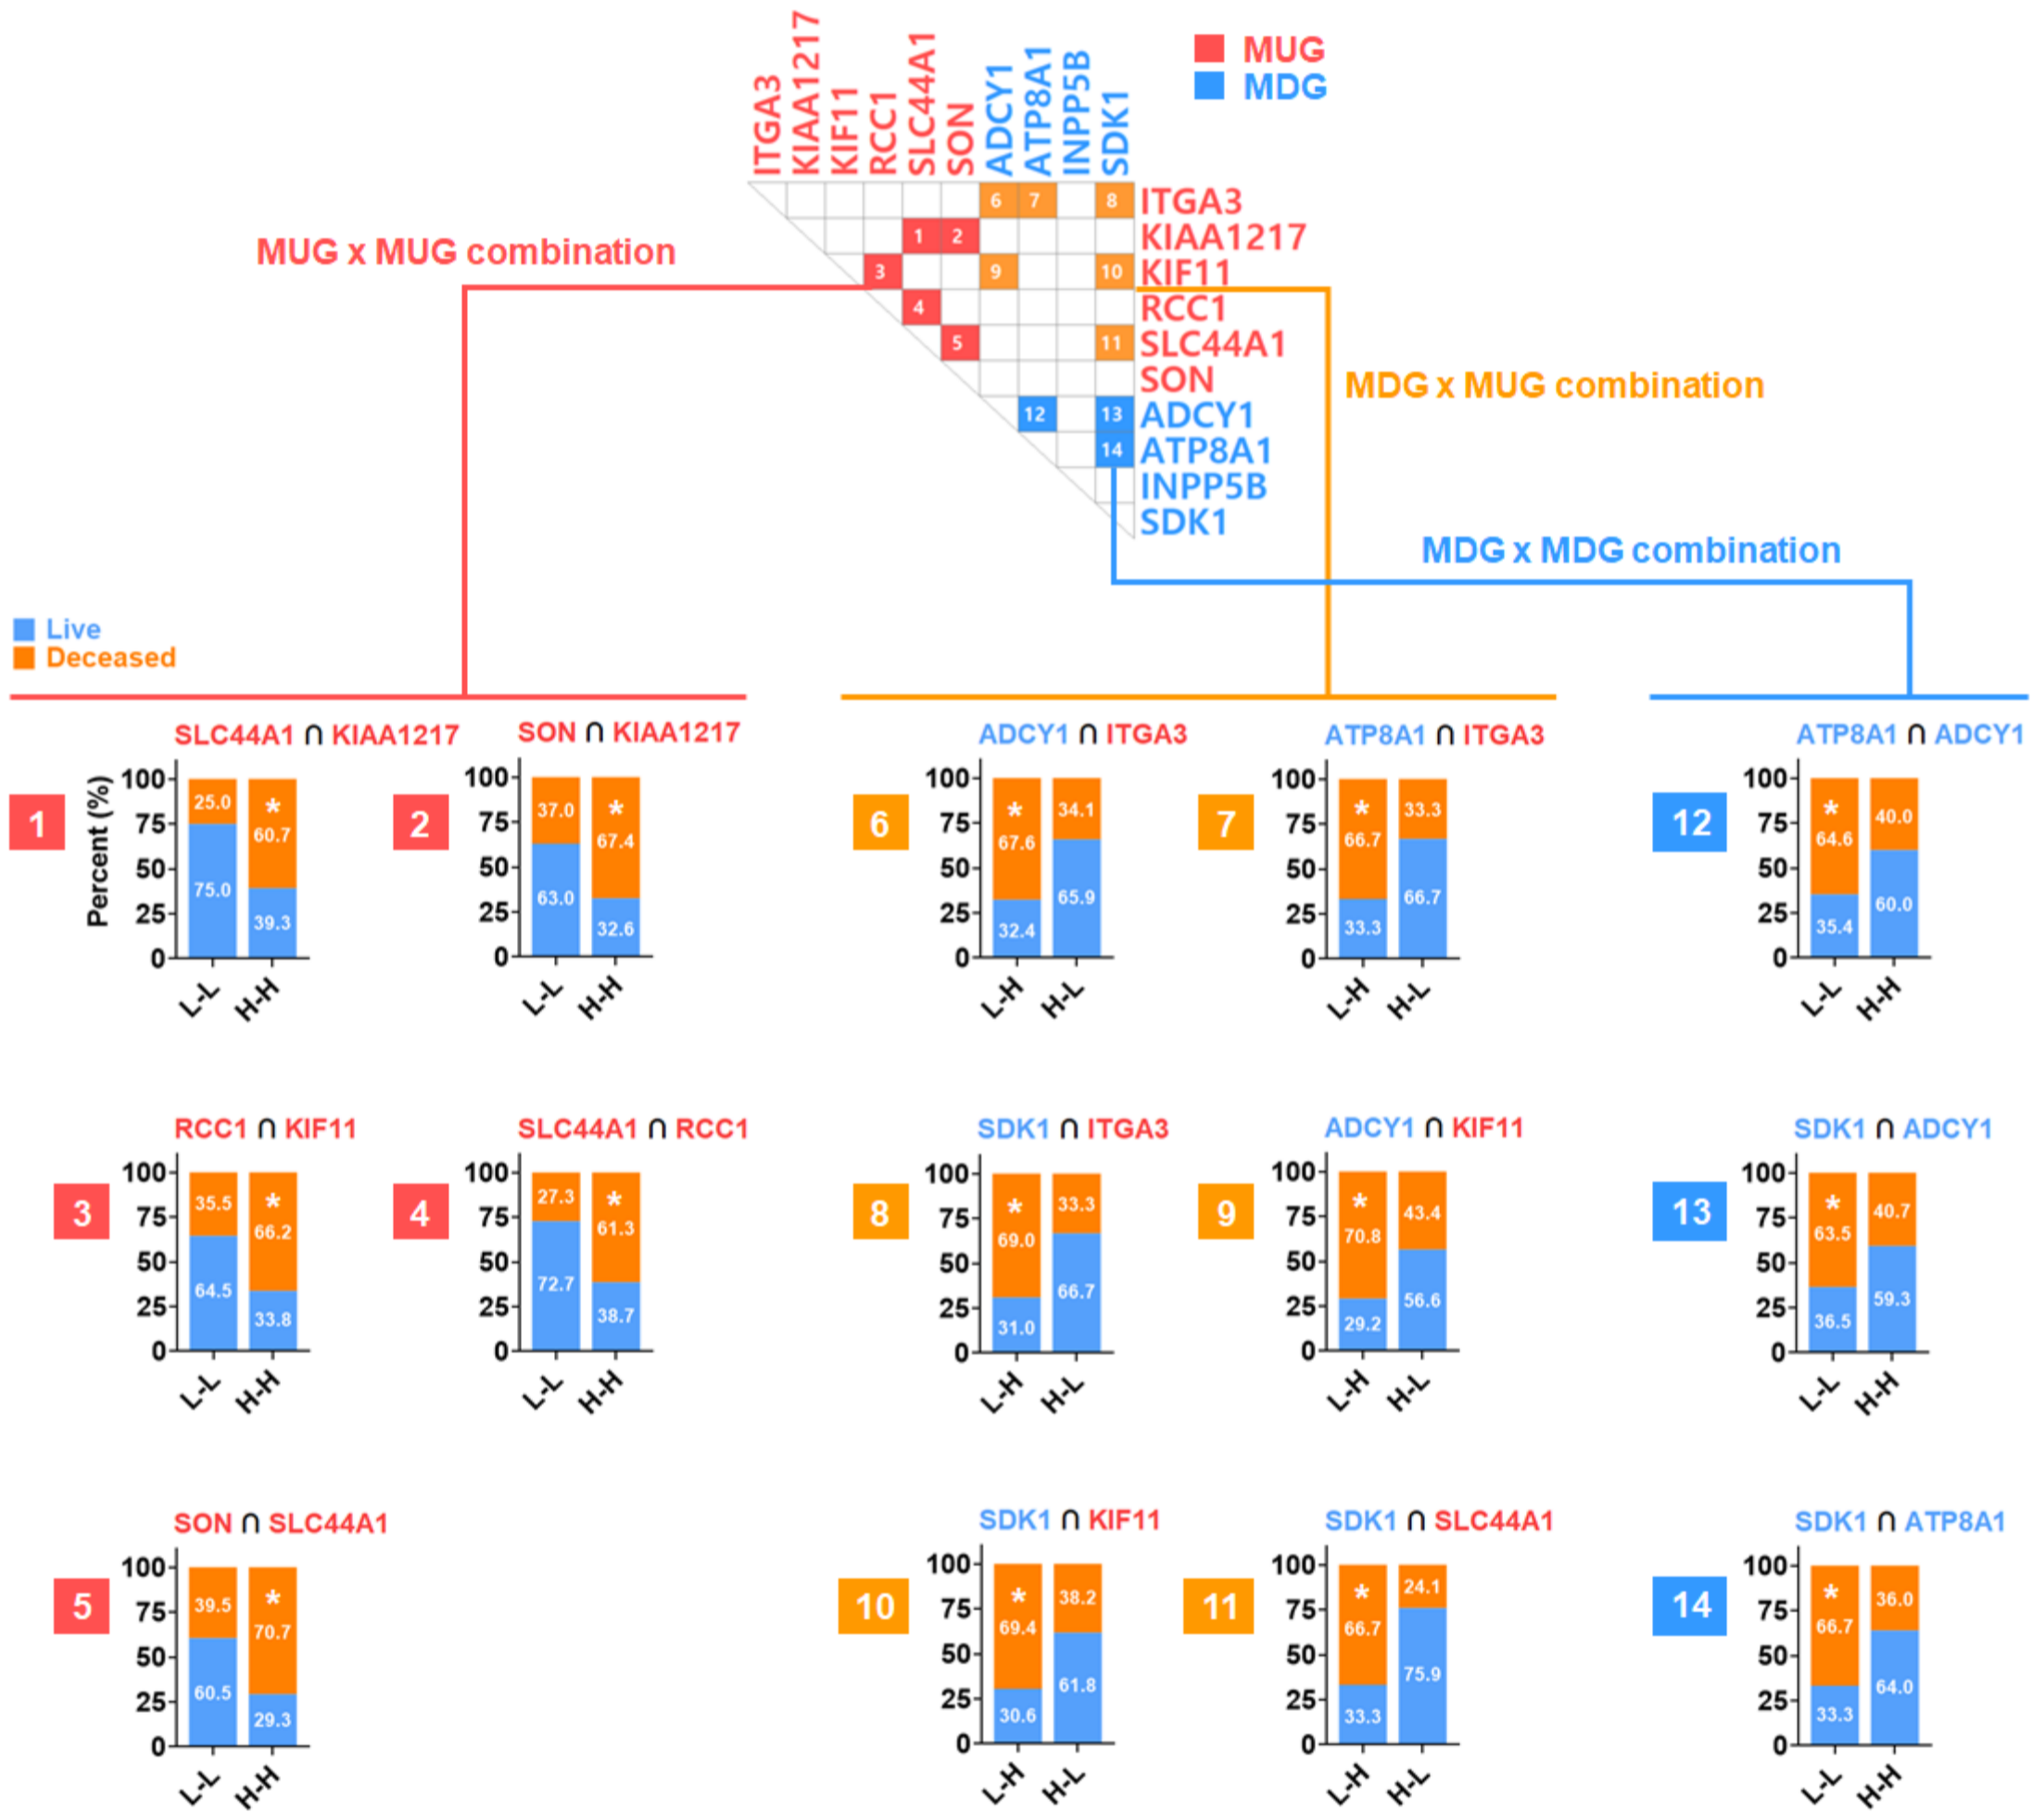

Supplement: MOESM8 [file 27084746]
